# Supplementary material
Source: PubMed Central journal article supplement (PMC5036397)

**Statement concerning agreement to the final author order**

Manuscript Title:

Relationship between Measures of Adiposity, Arterial Inflammation and Subsequent Cardiovascular Events

Official Final Author List:

Amparo L. Figueroa#, Richard A. P. Takx#, Megan H. MacNabb, Amr Abdelbaky, Zachary R. Lavender, Rebecca S. Kaplan, Quynh A. Truong, Janet Lo, Brian B. Ghoshhajra, Steven K. Grinspoon, Udo Hoffmann, Ahmed Tawakol

# contributed equally to the study

Journal:

Circulation: Cardiovascular Imaging

Contributing author attests to his/her agreement to the final author order

Author (print or type) AMPARO FIGUEROA Date: 1/22/2016

Signature: 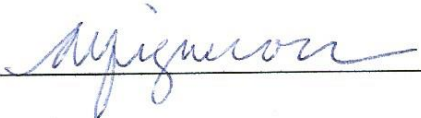

**Statement concerning agreement to the final author order**

Manuscript Title:

Relationship between Measures of Adiposity, Arterial Inflammation and Subsequent Cardiovascular Events

Official Final Author List:

Amparo L. Figueroa#, Richard A. P. Takx#, Megan H. MacNabb, Amr Abdelbaky, Zachary R. Lavender, Rebecca S. Kaplan, Quynh A. Truong, Janet Lo, Brian B. Ghoshhajra, Steven K. Grinspoon, Udo Hoffmann, Ahmed Tawakol

# contributed equally to the study

Journal:

Circulation: Cardiovascular Imaging

Contributing author attests to his/her agreement to the final author order

Author (print or type) Richard Takx Date: 01-26-2016

Signature: 

**Statement concerning agreement to the final author order**

Manuscript Title:

Relationship between Measures of Adiposity, Arterial Inflammation and Subsequent Cardiovascular Events

Official Final Author List:

Amparo L. Figueroa#, Richard A. P. Takx#, Megan H. MacNabb, Amr Abdelbaky, Zachary R. Lavender, Rebecca S. Kaplan, Quynh A. Truong, Janet Lo, Brian B. Ghoshhajra, Steven K. Grinspoon, Udo Hoffmann, Ahmed Tawakol

# contributed equally to the study

Journal:

Circulation: Cardiovascular Imaging

Contributing author attests to his/her agreement to the final author order

Author (print or type) Megan H. MacNabb Date: 01/17/2016

Signature: 

**Statement concerning agreement to the final author order**

**Manuscript Title:**

Relationship between Measures of Adiposity, Arterial Inflammation and Subsequent Cardiovascular Events

**Official Final Author List:**

Amparo L. Figueroa#, Richard A. P. Takx#, Megan H. MacNabb, Amr Abdelbaky, Zachary R. Lavender, Rebecca S. Kaplan, Quynh A. Truong, Janet Lo, Brian B. Ghoshhajra, Steven K. Grinspoon, Udo Hoffmann, Ahmed Tawakol

# contributed equally to the study

**Journal:**

Circulation: Cardiovascular Imaging

Contributing author attests to his/her agreement to the final author order

Author (print or type) AMR ABDELBAKY Date: 1/22/2016

Signature: 

**Statement concerning agreement to the final author order**

Manuscript Title:

Relationship between Measures of Adiposity, Arterial Inflammation and Subsequent Cardiovascular Events

Official Final Author List:

Amparo L. Figueroa#, Richard A. P. Takx#, Megan H. MacNabb, Amr Abdelbaky, Zachary R. Lavender, Rebecca S. Kaplan, Quynh A. Truong, Janet Lo, Brian B. Ghoshhajra, Steven K. Grinspoon, Udo Hoffmann, Ahmed Tawakol  
# contributed equally to the study

Journal:

Circulation: Cardiovascular Imaging

Contributing author attests to his/her agreement to the final author order

Author (print or type) Zachary Lavender Date: 01/15/16

Signature: \_\_\_\_\_

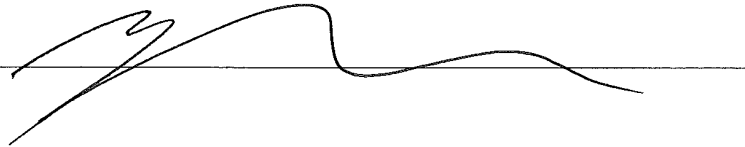A handwritten signature in black ink, appearing to read 'Zachary Lavender', is written over a horizontal line. The signature is fluid and cursive, with a large initial 'Z'.

**Statement concerning agreement to the final author order**

Manuscript Title:

Relationship between Measures of Adiposity, Arterial Inflammation and Subsequent Cardiovascular Events

Official Final Author List:

Amparo L. Figueroa#, Richard A. P. Takx#, Megan H. MacNabb, Amr Abdelbaky, Zachary R. Lavender, Rebecca S. Kaplan, Quynh A. Truong, Janet Lo, Brian B. Ghoshhajra, Steven K. Grinspoon, Udo Hoffmann, Ahmed Tawakol

# contributed equally to the study

Journal:

Circulation: Cardiovascular Imaging

Contributing author attests to his/her agreement to the final author order

Author (print or type) Rebecca Kaplan Date: 01/25/2016

Signature: 

**Statement concerning agreement to the final author order**

Manuscript Title:

Relationship between Measures of Adiposity, Arterial Inflammation and Subsequent Cardiovascular Events

Official Final Author List:

Amparo L. Figueroa#, Richard A. P. Takx#, Megan H. MacNabb, Amr Abdelbaky, Zachary R. Lavender, Rebecca S. Kaplan, Quynh A. Truong, Janet Lo, Brian B. Ghoshhajra, Steven K. Grinspoon, Udo Hoffmann, Ahmed Tawakol

# contributed equally to the study

Journal:

Circulation: Cardiovascular Imaging

Contributing author attests to his/her agreement to the final author order

Author (print or type) Quynh Truong Date: 1/15/2016

Signature:  Digitally signed by Quynh A. Truong, MD MPH  
DN: cn=Quynh A. Truong, MD MPH, o=New  
York Presbyterian Hospital, ou=Weill Cornell  
Medical College,  
email=qat9001@med.cornell.edu, c=US  
Date: 2016.01.15 13:48:19 -0500

**Statement concerning agreement to the final author order**

Manuscript Title:

Relationship between Measures of Adiposity, Arterial Inflammation and Subsequent Cardiovascular Events

Official Final Author List:

Amparo L. Figueroa#, Richard A. P. Takx#, Megan H. MacNabb, Amr Abdelbaky, Zachary R. Lavender, Rebecca S. Kaplan, Quynh A. Truong, Janet Lo, Brian B. Ghoshhajra, Steven K. Grinspoon, Udo Hoffmann, Ahmed Tawakol

# contributed equally to the study

Journal:

Circulation: Cardiovascular Imaging

Contributing author attests to his/her agreement to the final author order

Author (print or type) Janet Lo Date: 1/22/16

Signature:  \_\_\_\_\_



**Statement concerning agreement to the final author order**

Manuscript Title:

Relationship between Measures of Adiposity, Arterial Inflammation and Subsequent Cardiovascular Events

Official Final Author List:

Amparo L. Figueroa#, Richard A. P. Takx#, Megan H. MacNabb, Amr Abdelbaky, Zachary R. Lavender, Rebecca S. Kaplan, Quynh A. Truong, Janet Lo, Brian B. Ghoshhajra, Steven K. Grinspoon, Udo Hoffmann, Ahmed Tawakol

# contributed equally to the study

Journal:

Circulation: Cardiovascular Imaging

Contributing author attests to his/her agreement to the final author order

Author (print or type) Brian B. Ghoshhajra, MD Date: 1/15/16

Signature:  MD

**Statement concerning agreement to the final author order**

Manuscript Title:

Relationship between Measures of Adiposity, Arterial Inflammation and Subsequent Cardiovascular Events

Official Final Author List:

Amparo L. Figueroa#, Richard A. P. Takx#, Megan H. MacNabb, Amr Abdelbaky, Zachary R. Lavender, Rebecca S. Kaplan, Quynh A. Truong, Janet Lo, Brian B. Ghoshhajra, Steven K. Grinspoon, Udo Hoffmann, Ahmed Tawakol

# contributed equally to the study

Journal:

Circulation: Cardiovascular Imaging

Contributing author attests to his/her agreement to the final author order

Author (print or type) Steve Grinspoon Date: 1/22/16

Signature: 

**Statement concerning agreement to the final author order**

**Manuscript Title:**

Relationship between Measures of Adiposity, Arterial Inflammation and Subsequent Cardiovascular Events

**Official Final Author List:**

Amparo L. Figueroa#, Richard A. P. Takx#, Megan H. MacNabb, Amr Abdelbaky, Zachary R. Lavender, Rebecca S. Kaplan, Quynh A. Truong, Janet Lo, Brian B. Ghoshhajra, Steven K. Grinspoon, Udo Hoffmann, Ahmed Tawakol

# contributed equally to the study

**Journal:**

Circulation: Cardiovascular Imaging

Contributing author attests to his/her agreement to the final author order

Author (print or type) Udo Hoffmann Date: 01/18/16

Signature: 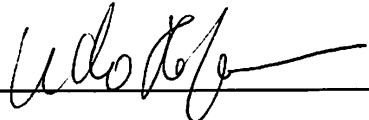

**Statement concerning agreement to the final author order**

Manuscript Title:

Relationship between Measures of Adiposity, Arterial Inflammation and Subsequent Cardiovascular Events

Official Final Author List:

Amparo L. Figueroa#, Richard A. P. Takx#, Megan H. MacNabb, Amr Abdelbaky, Zachary R. Lavender, Rebecca S. Kaplan, Quynh A. Truong, Janet Lo, Brian B. Ghoshhajra, Steven K. Grinspoon, Udo Hoffmann, Ahmed Tawakol

# contributed equally to the study

Journal:

Circulation: Cardiovascular Imaging

Contributing author attests to his/her agreement to the final author order

Author (print or type) Ahmed Tawakol Date: 19 Jan 2016

Signature: 

Supplement: NIHMS768829-supplement-Statement_concerning_agreement_to_the_final_author_order.pdf [file NIHMS768829-supplement-Statement_concerning_agreement_to_the_final_author_order.pdf]
